# Supplementary material for: Preparation of new bio-based antibacterial acrylic bone cementviamodification with a biofunctional monomer of nitrofurfuryl methacrylate
Source: Royal Society of Chemistry journal article supplement (doi:10.1039/d2py00235c), 2022-01-01
Supplement: d2py00235c1.pdf [file d2py00235c1.pdf]

## Supplementary Information

### **Preparation of new bio-based antibacterial acrylic bone cement via modification with biofunctional monomer of nitrofurfuryl methacrylate**

*Jianjun Chu,<sup>‡a,b</sup> Chuang Li,<sup>‡a</sup> Jing Guo,<sup>a</sup> Yang Xu<sup>b</sup> and Yao Fu<sup>\*a</sup>*

*a. CAS Key Laboratory of Urban Pollutant Conversion, Department of Applied Chemistry,  
University of Science and Technology of China, Hefei 230026, China.*

*b. The Second People's Hospital of Hefei, Hefei 230011, China.*

*‡ These authors contributed equally to this work.*

## Contents

**Table S1 Formulations of experimental bone cements.**

| Formulations      | Solid component (g) |                   |     | Liquid component (g) |      |
|-------------------|---------------------|-------------------|-----|----------------------|------|
|                   | p(NFMA-co-MMA)      | BaSO <sub>4</sub> | BPO | MMA                  | DMPT |
| PMMA              | 16.6                | 3.0               | 0.4 | 9.8                  | 0.2  |
| p(5%NFMA-co-MMA)  | 16.6                | 3.0               | 0.4 | 9.8                  | 0.2  |
| p(10%NFMA-co-MMA) | 16.6                | 3.0               | 0.4 | 9.8                  | 0.2  |
| p(20%NFMA-co-MMA) | 16.6                | 3.0               | 0.4 | 9.8                  | 0.2  |
| PNFMA             | 16.6                | 3.0               | 0.4 | 9.8                  | 0.2  |

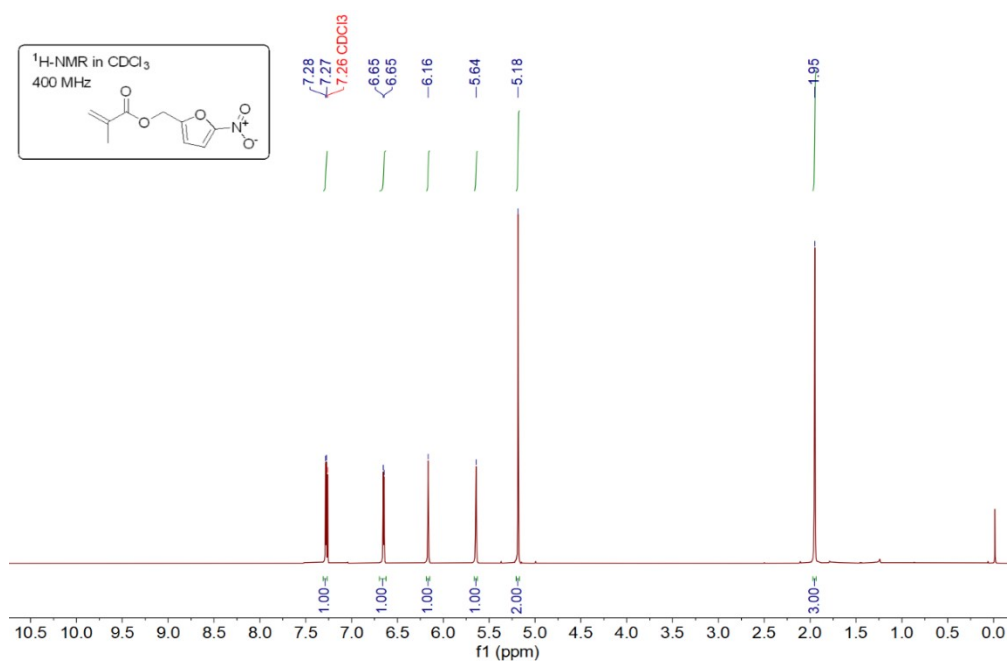

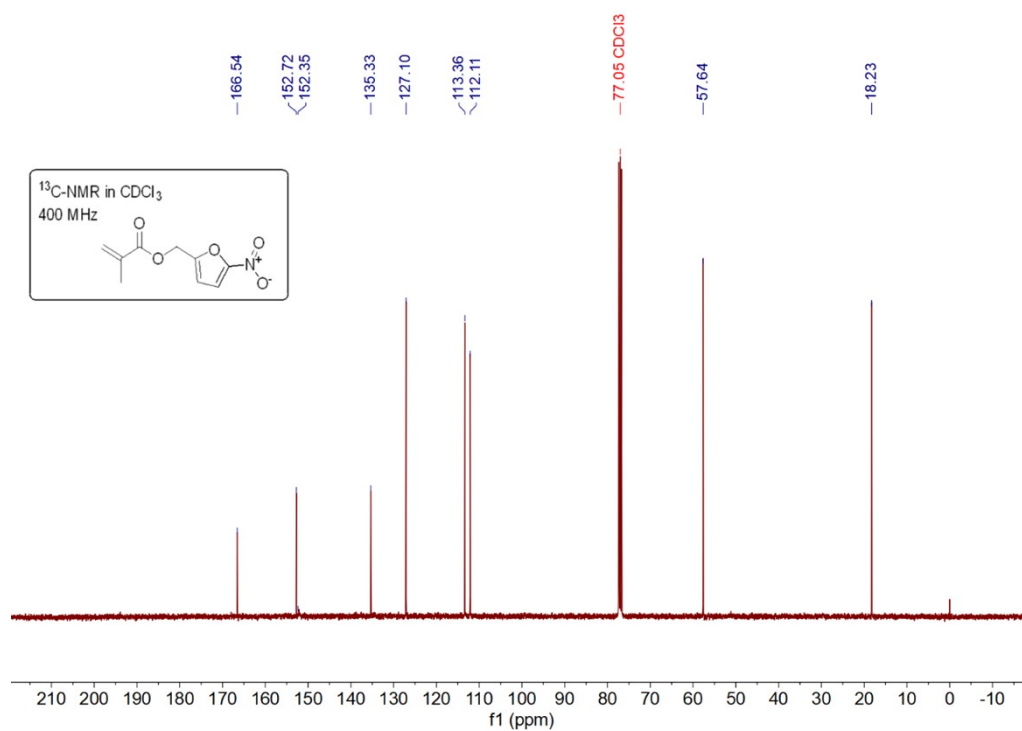

**Figure S1.** The <sup>1</sup>H NMR spectra and <sup>13</sup>C NMR spectra (ppm, CDCl<sub>3</sub>) of NFMA.

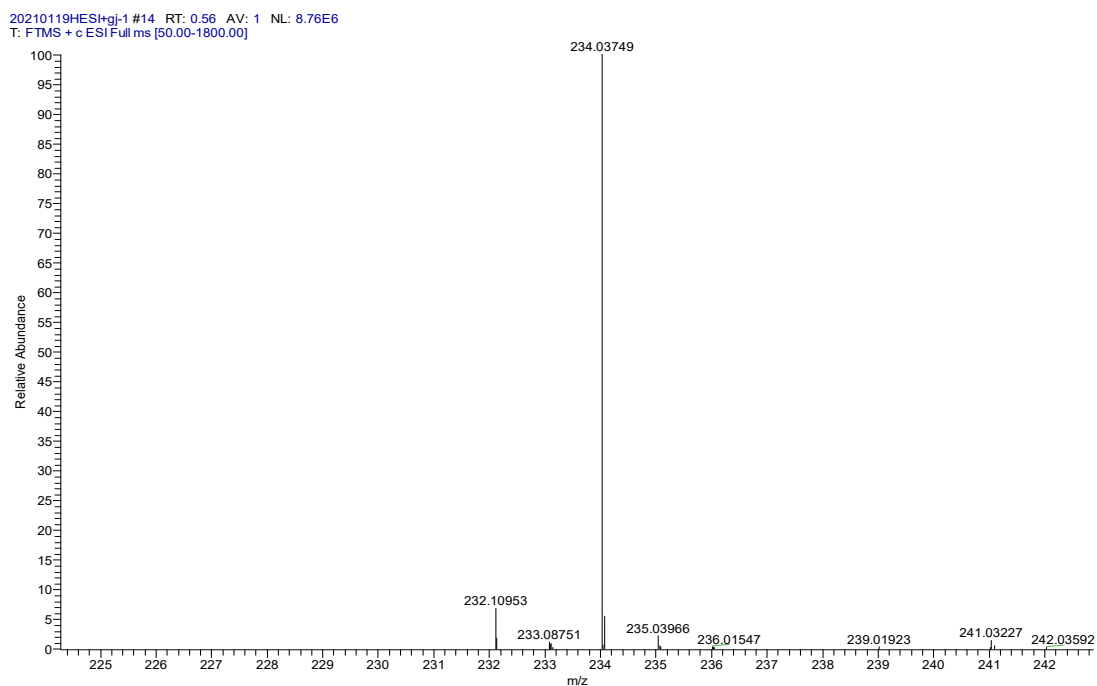

| m/z      | Intensity | Relative | Theo. Mass | Delta(mmu) | Composition                                       |
|----------|-----------|----------|------------|------------|---------------------------------------------------|
| 234.0375 | 8755501   | 100      | 234.03729  | 0.2        | C <sub>9</sub> H <sub>9</sub> O <sub>5</sub> N Na |

**Figure S2.** The mass spectrum of NFMA

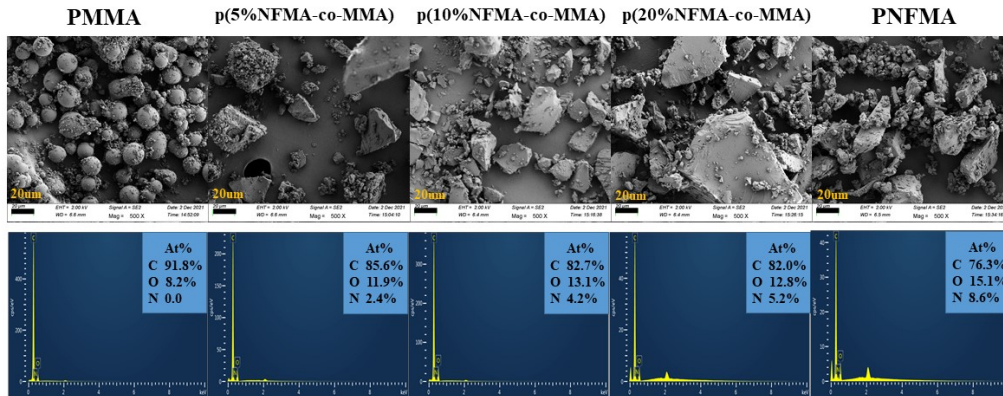

**Figure S3. SEM images and EDS spectrums of PMMA, PNFMA and the p(NFMA-co-MMA) biomass-based bone cement materials.**

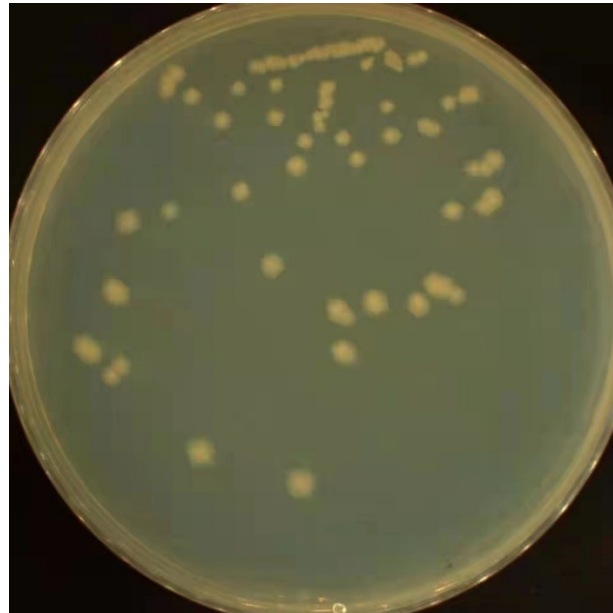

**Figure S4. Mapes of antimicrobial testing from the plate counting method**

Method of antimicrobial test has been listed in paper that direct contact test (DCT) was used to evaluate bone cements' antibacterial activity. For counting of colonies, the plate counting method was accounted: Concentration gradients was set as original sample,  $10^{-1}$ ,  $10^{-3}$ ,  $10^{-5}$  and  $10^{-7}$  dilution to promise the serises begins with a sample containing an unknown concentration of cells and ends with a very dilute mixture containing only a few cells. The plates with 30-200 colonies was used to calculate the bacterial concentration.

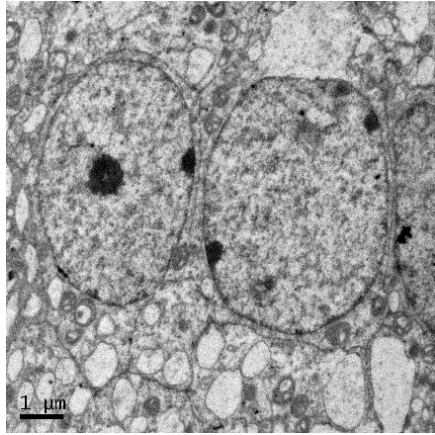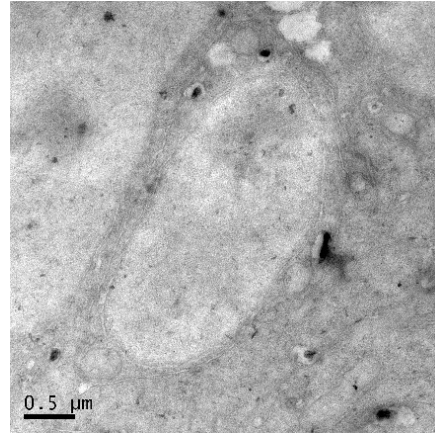

**Figure S5. The SEM and TEM maps of bacterial morphology.**
